# Supplementary material for: Quantitative sequence-function relationships in proteins based on gene ontology
Source: Springer Nature journal article supplement (doi:10.1186/1471-2105-8-294), 2007-08-08
Supplement: Additional file 1 [file 1471-2105-8-294-s1.doc]

Title: Comparison of sequence identity using the pair-wise ‘Muscle’ alignments and the multiple sequence alignments provided by PFAM.
